# Supplementary material for: Insight into mineralizer modified and tailored scorodite crystal characteristics and leachability for arsenic-rich smelter wastewater stabilization
Source: Royal Society of Chemistry journal article supplement (doi:10.1039/c8ra01721b), 2018-01-01
Supplement: c8ra01721b1.pdf [file c8ra01721b1.pdf]

## Supplementary Information

### **Insight into the mineralizer modified and tailored scorodite crystal characteristic and leachability for arsenic-rich smelter wastewater stabilization**

Yonggang Sun<sup>a,b</sup>, Qi Yao<sup>a,b</sup>, Xin Zhang\*<sup>a,b</sup>, Hongling Yang<sup>a,b</sup>, Na Li<sup>a,b</sup>, Zhongshen Zhang<sup>a,b</sup>,  
Zhengping Hao<sup>a,b</sup>

<sup>a</sup> Department of Environmental Nano-materials, Research Center for Eco-Environmental Sciences, Chinese Academy of Sciences, Beijing 100085, P. R. China

<sup>b</sup> National Engineering Laboratory for VOCs Pollution Control material & Technology, University of Chinese Academy of Sciences, Beijing 101408, P. R. China

Corresponding author: Dr. X Zhang; Tel.: +86-10-62843688; Fax: +86-10-62843096

E-mail: zhangxin@rcees.ac.cn

**Table S1** Detailed results compare with the literature data for arsenic leachability.

| Conditions                          | Arsenic leachability | Reference |
|-------------------------------------|----------------------|-----------|
| pH=5 and 22 °C                      | 0.5 mg/L             | 1         |
| pH=5 and 22 °C                      | 0.35 mg/L            | 2         |
| pH=6 and 22 °C                      | 0.96 mg/L            | 2         |
| pH=7 and 22 °C                      | 5.87 mg/L            | 2         |
| , At neutral pH and 22 °C, 24 weeks | 5.9 mg/L             | 3         |
| pH=2.8-5.3                          | <0.5 mg/L            | 4         |
| pH=7 and 22 °C                      | 3.6 mg/L             | 5         |
| pH=3.0, 30 °C                       | 4.0 mg/L             | 6         |
| pH=3.0, 70 °C                       | 1.0 mg/L             | 6         |
| n(Fe/As)=0.8-3.0, pH=4.0            | 0.6-6.3 mg/L         | 6         |
| NaF mineralizer, pH=2.5             | 0.39 mg/L            | This work |

### References:

1. S. Singhanian, Q.K. Wang, D. Filippou, G.P. Demopoulos. Acidity, Valency and Third-Ion Effects on the Precipitation of Scorodite from Mixed Sulfate Solutions under Atmospheric-Pressure Conditions, *metallurgical and materials transactions b*, 2006, 37B, 189-197.
2. G.P. Demopoulos. On the preparation and stability of scorodite, *Arsenic Metallurgy* Edited by R.G. Reddy and V. Ramachandran TMS (The Minerals, Metals & Materials Society), 2005
3. M-C. Bluteau, P.G, Demopoulos. The incongruent dissolution of scorodite-Solubility, kinetics and mechanism. *Hydrometallurgy*, 87, 2007, 163-177.
4. E. Krause, V.A. Ettel, Solubilities and stabilities of ferric arsenate compounds. *Hydrometallurgy*, 22, 1989, 311-337.
5. M-C. Bluteau, L. Becze, G.P. Demopoulos, the dissolution of scorodite in gypsum-saturated waters: Evidence of Ca-Fe-AsO<sub>4</sub> mineral formation and its impact on arsenic retention, *Hydrometallurgy*, 97, 2009, 221-227.
6. X.B. Min, Y.P. Liao, L.Y. Chai, Z.H. Yang, S. Xiong, L. Liu, Q.Z. Li, Removal and stabilization of arsenic from anode slime by forming crystal scorodite, *Trans. Nonferrous Met. Soc. China*, 25, 2015, 1298-1306.

**Table S2.** The concentration of pre-treatment, leachability and composition of solid precipitates at various mineralizers ( $\text{Na}_2\text{SiO}_3 \cdot 9\text{H}_2\text{O}$ ,  $\text{Al}(\text{NO}_3)_3 \cdot 9\text{H}_2\text{O}$ , and  $\text{NaF}$ ) and temperature (120 °C, 150 °C, and 180 °C) for 25h.

| Sample              | Washing steps (pre-treatment)/ mg/L |    |      | As-leachability/mg/L |      |       | Solid precipitates/% |      |       |       |          |
|---------------------|-------------------------------------|----|------|----------------------|------|-------|----------------------|------|-------|-------|----------|
|                     | Al                                  | Fe | As   | Al                   | Fe   | As    | Al                   | Na   | Fe    | As    | n(Fe/As) |
| 120-Al <sup>a</sup> | ND <sup>b</sup>                     | ND | 0.04 | ND                   | ND   | 1.22  | 2.41                 | 1.11 | 25.27 | 26.86 | 1.26     |
| 150-Al              | ND                                  | ND | ND   | ND                   | ND   | 1.49  | 1.86                 | 1.30 | 31.27 | 25.85 | 1.62     |
| 180-Al              | ND                                  | ND | 0.10 | ND                   | ND   | 3.10  | 1.38                 | 0.76 | 33.71 | 27.20 | 1.66     |
| Sample              | Si                                  | Fe | As   | Si                   | Fe   | As    | Si                   | Na   | Fe    | As    | n(Fe/As) |
| 120-Si              | 3.5                                 | ND | 0.25 | 114.9                | 4.3  | 12.46 | 0.55                 | 2.20 | 20.88 | 28.54 | 0.98     |
| 150-Si              | 1.7                                 | ND | 0.11 | 102.8                | 1.9  | 4.81  | 0.27                 | 4.31 | 23.95 | 29.70 | 1.08     |
| 180-Si              | 1.4                                 | ND | ND   | 101.6                | 2.7  | 4.64  | 0.68                 | 5.52 | 28.65 | 28.63 | 1.34     |
| Sample              | F                                   | Fe | As   | F                    | Fe   | As    | F                    | Na   | Fe    | As    | n(Fe/As) |
| 120-F               | 0.5                                 | ND | ND   | 6.2                  | ND   | 1.49  | 0.044                | 1.71 | 23.84 | 31.61 | 1.01     |
| 150-F               | 1.1                                 | ND | ND   | 8.5                  | 0.13 | 0.39  | 0.030                | 1.32 | 23.75 | 29.18 | 1.09     |
| 180-F               | 1.7                                 | ND | ND   | 9.7                  | ND   | 0.55  | 0.014                | 1.17 | 28.37 | 27.53 | 1.38     |

<sup>a</sup> The sample was obtained from  $\text{Al}(\text{NO}_3)_3 \cdot 9\text{H}_2\text{O}$ -modified at 120 °C, other sample descriptions are similar.

<sup>b</sup> The ND expressed as undetected, the fluoride ( $\text{F}^-$ ) concentration was measured by Ion Chromatograph and the other elements was analyzed by ICP-OES.

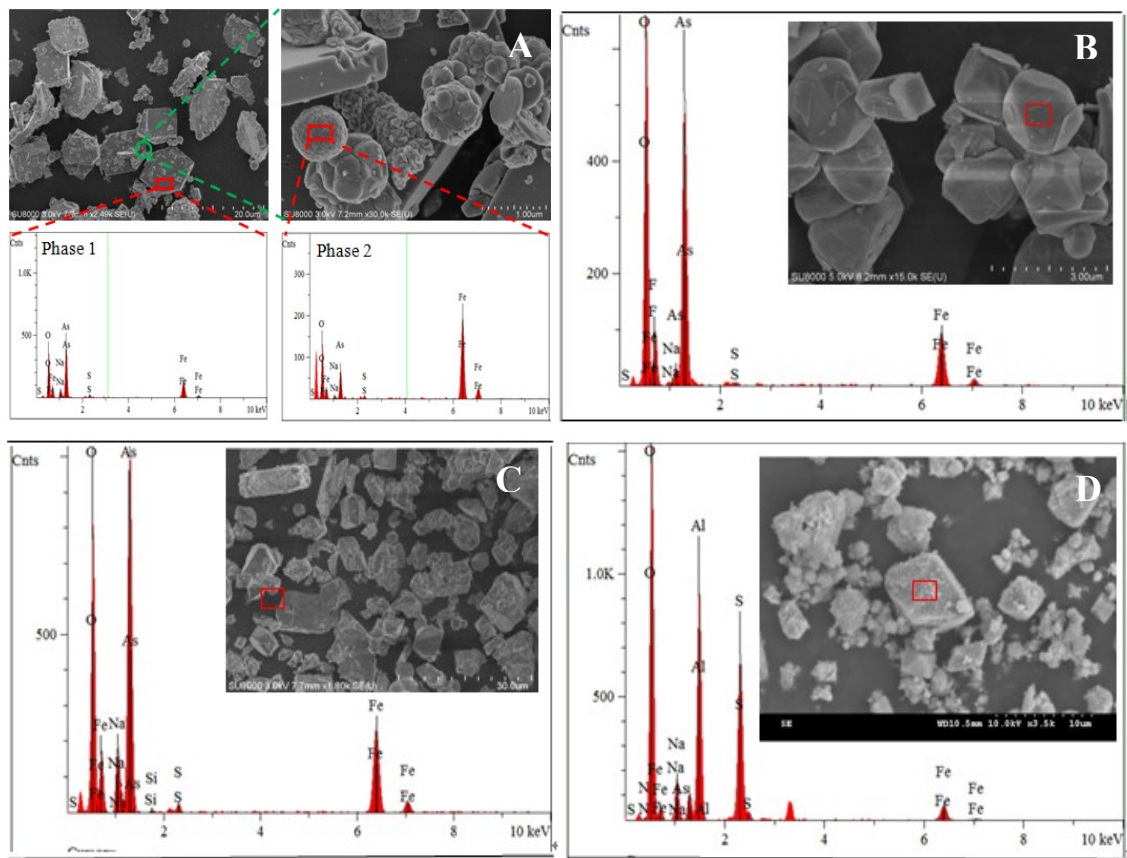

**Fig. S1.** SEM images and particles surface composition of solid precipitate at various mineralizers (A)H<sub>2</sub>O control group, (B)NaF-modified, (C)Na<sub>2</sub>SiO<sub>3</sub>·9H<sub>2</sub>O-modified, and (D)Al(NO<sub>3</sub>)<sub>3</sub>·9H<sub>2</sub>O-modified for 180 °C. conditions.

**Table S3.** SEM-EDS for particles surface phase composition of solid precipitate at various mineralizers for 180 °C.

| Experimental group                                            | Element content (wt%) |      |      |      |      |      |     |      |           |
|---------------------------------------------------------------|-----------------------|------|------|------|------|------|-----|------|-----------|
|                                                               |                       | Fe   | O    | As   | F    | Al   | Si  | S    | n (Fe/As) |
| H <sub>2</sub> O control group                                | Phase 1               | 29.0 | 30.5 | 33.5 | /    | /    | /   | /    | 1.2       |
|                                                               | Phase 2               | 44.1 | 43.0 | 11.1 | /    |      |     |      | 5.3       |
| NaF-modified                                                  | Phase 1               | 23.3 | 41.0 | 30.5 | 0.00 | /    | /   | /    | 1.0       |
| Na <sub>2</sub> SiO <sub>3</sub> ·9H <sub>2</sub> O-modified  | Phase 1               | 27.0 | 33.1 | 31.8 | /    | /    | 0.4 | 0.8  | 1.1       |
| Al(NO <sub>3</sub> ) <sub>3</sub> ·9H <sub>2</sub> O-modified | Phase 1               | 5.6  | 51.3 | 5.9  | /    | 17.9 | /   | 14.5 | 1.4       |

**Table S4.** The majority of XRD patterns of solid precipitate at various mineralizers and hydrothermal mineralization temperature.

| mineralizers                                                  | Hydrothermal mineralization temperature/ <sup>o</sup> C <sup>a</sup> |           |           |
|---------------------------------------------------------------|----------------------------------------------------------------------|-----------|-----------|
|                                                               | 120                                                                  | 150       | 180       |
| H <sub>2</sub> O control group                                | S                                                                    | F, S, B   | F, S, B,G |
| Na <sub>2</sub> SiO <sub>3</sub> ·9H <sub>2</sub> O-modified  | S                                                                    | F, S, B,G | F, S, B,G |
| Al(NO <sub>3</sub> ) <sub>3</sub> ·9H <sub>2</sub> O-modified | F, S, B                                                              | F, S, B   | F, S, B   |
| NaF-modified                                                  | S                                                                    | S         | F, S, B,G |

<sup>a</sup> “S” refers to the SD phase (scorodite); “F” refers to the FAsH phase (FeAsO<sub>4</sub>·0.75H<sub>2</sub>O); “G” refers to the goethite phase (PDF NO. 81-0462) “B” refers to the BFAS phase (Fe(AsO<sub>4</sub>)<sub>1-x</sub>(SO<sub>4</sub>)<sub>x</sub>(OH)<sub>x</sub>·(1-x)H<sub>2</sub>O).

Table S5 the semi-quantitative how much of each phase (scorodite, FAsH, BFAS, and goethite) in solid samples via JADE software.

| Sample                                                        | Temperatures/°C | Phase composition/% |       |          |       |
|---------------------------------------------------------------|-----------------|---------------------|-------|----------|-------|
|                                                               |                 | Scorodite           | FAsH  | Goethite | BFAS  |
| H <sub>2</sub> O control group                                | 120             | 100                 | -     | -        | -     |
|                                                               | 150             | 77.04               | 8.01  | -        | 14.75 |
|                                                               | 180             | 71.48               | 12.74 | 7.90     | 7.52  |
| Al(NO <sub>3</sub> ) <sub>3</sub> ·9H <sub>2</sub> O-modified | 120             | 87.24               | 9.04  | -        | 3.10  |
|                                                               | 150             | 84.78               | 4.72  | -        | 8.39  |
|                                                               | 180             | 82.97               | 10.24 | -        | 11.62 |
| Na <sub>2</sub> SiO <sub>3</sub> ·9H <sub>2</sub> O-modified  | 120             | 100                 | -     | -        | -     |
|                                                               | 150             | 74.31               | 11.14 | 1.41     | 12.04 |
|                                                               | 180             | 69.01               | 12.47 | 1.94     | 14.71 |
| NaF-modified                                                  | 120             | 100                 | -     | -        | -     |
|                                                               | 150             | 100                 | -     | -        | -     |
|                                                               | 180             | 79.47               | 5.48  | 5.19     | 9.79  |
